# Supplementary material for: Impacts of short-term mitigation measures on PM 2.5 and radiative effects: a case study from a regional background site near Beijing, China
Source: Copernicus journal article supplement (doi:10.5194/acp-2018-548), 2018-10-19
Supplement: Supplementary file 1 [file acp-2018-548-supplement.pdf]

# Impacts of short-term mitigation measures on PM<sub>2.5</sub> and radiative effects: a case study from a regional background site near Beijing, China

Qiyuan Wang<sup>1\*</sup>, Suixin Liu<sup>1</sup>, Nan Li<sup>2</sup>, Wenting Dai<sup>1</sup>, Yunfei Wu<sup>3</sup>, Jie Tian<sup>4</sup>, Yaqing Zhou<sup>1</sup>, Meng Wang<sup>1</sup>, Steven Sai Hang Ho<sup>1</sup>, Yang Chen<sup>5</sup>, Renjian Zhang<sup>3</sup>, Shuyu Zhao<sup>1</sup>, Chongshu Zhu<sup>1</sup>, Yongming Han<sup>1,6</sup>, Xuexi Tie<sup>1</sup>, Junji Cao<sup>1,7\*</sup>

<sup>1</sup>Key Laboratory of Aerosol Chemistry and Physics, State Key Laboratory of Loess and Quaternary Geology, Institute of Earth Environment, Chinese Academy of Sciences, Xi'an, 710061, China.

<sup>2</sup>School of Environmental Science and Engineering, Nanjing University of Information Science & Technology, Nanjing, 210044, China

<sup>3</sup>Key Laboratory of Regional Climate-Environment Research for Temperate East Asia, Institute of Atmospheric Physics, Chinese Academy of Sciences, Beijing, 100029, China.

<sup>4</sup>Department of Environmental Science and Engineering, School of Energy and Power Engineering, Xi'an Jiaotong University, Xi'an 710049, China.

<sup>5</sup>Chongqing Institute of Green and Intelligent Technology, Chinese Academy of Sciences, Chongqing 400714, China.

<sup>6</sup>School of Human Settlements and Civil Engineering, Xi'an Jiaotong University, Xi'an, 710049, China.

<sup>7</sup>Institute of Global Environmental Change, Xi'an Jiaotong University, Xi'an, 710049, China.

*Correspondence to:* Junji Cao (cao@loess.llqg.ac.cn) and Qiyuan Wang (wangqy@ieecas.cn)

**Table S1.** Linear regression ( $y = a + bx$ ) between the observed and PMF-predicted mass concentrations of each chemical species in PM<sub>2.5</sub>.

| Species                       | Intercept | Slope | r    |
|-------------------------------|-----------|-------|------|
| OC                            | 0.92      | 0.88  | 0.97 |
| EC                            | -0.05     | 1.01  | 0.98 |
| Cl <sup>-</sup>               | 0.54      | 0.67  | 0.96 |
| NO <sub>3</sub> <sup>-</sup>  | -0.10     | 0.99  | 0.98 |
| SO <sub>4</sub> <sup>2-</sup> | 0.33      | 0.89  | 0.88 |
| NH <sub>4</sub> <sup>+</sup>  | 0.002     | 0.99  | 0.99 |
| K <sup>+</sup>                | -0.001    | 1.00  | 0.99 |
| Al                            | 0.11      | 0.72  | 0.75 |
| Si                            | 0.09      | 0.88  | 0.97 |
| Ca                            | -0.002    | 1.00  | 0.99 |
| Ti                            | 0.005     | 0.83  | 0.87 |
| Cr                            | 0.002     | 0.75  | 0.76 |
| Mn                            | 0.003     | 0.94  | 0.95 |
| Fe                            | 0.02      | 0.98  | 0.99 |
| Cu                            | 0.007     | 0.78  | 0.84 |
| Zn                            | 0.0004    | 0.99  | 0.99 |
| As                            | 0.001     | 0.54  | 0.68 |
| Br                            | 0.003     | 0.49  | 0.80 |
| Pb                            | 0.01      | 0.86  | 0.90 |

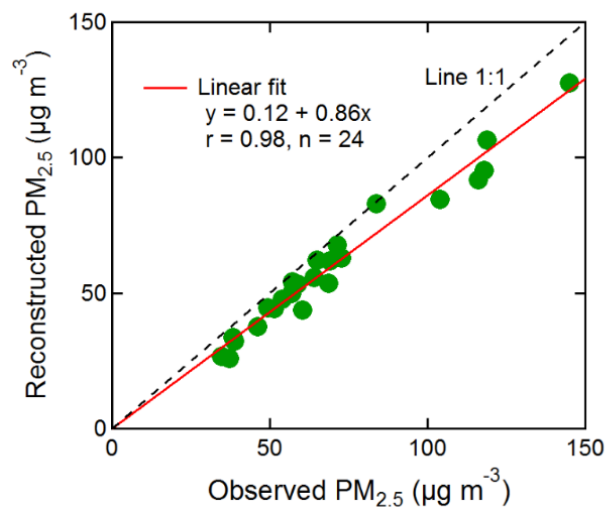

**Figure S1.** Scatter-plot of the reconstructed and observed PM<sub>2.5</sub> mass concentrations.

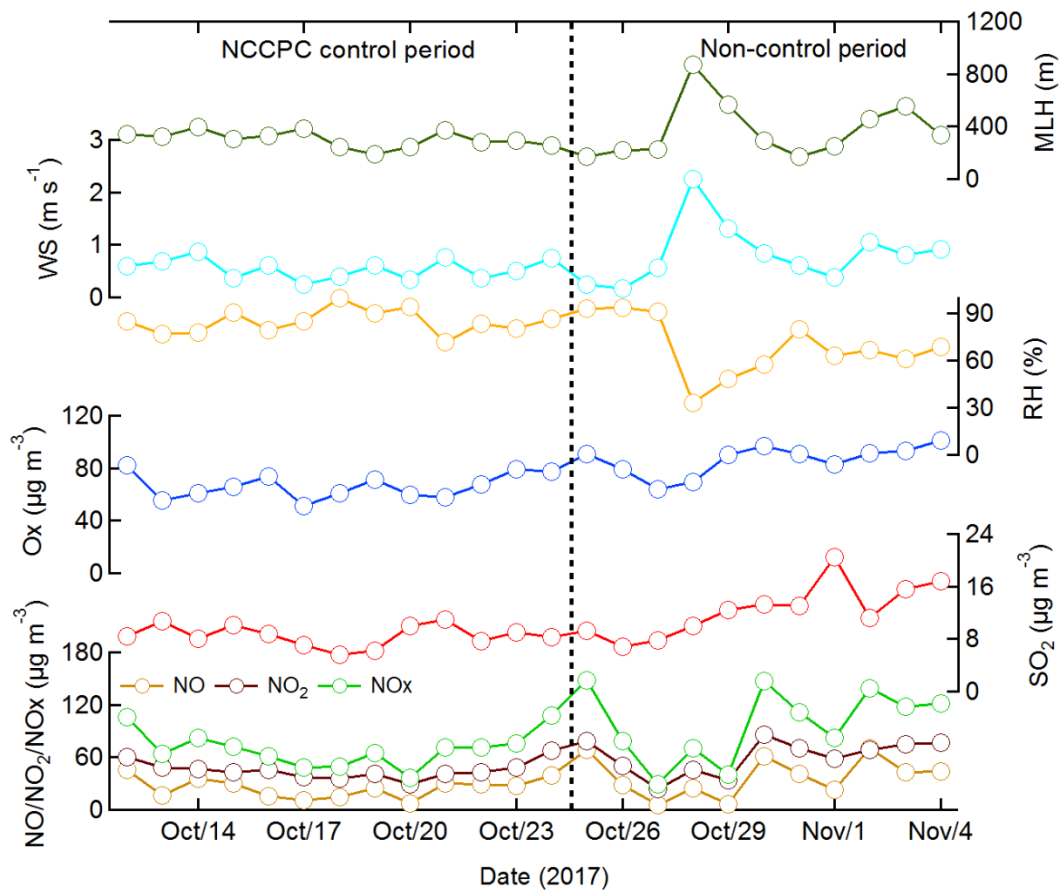

**Figure S2.** Daily variations of the concentrations of NO<sub>x</sub> (NO + NO<sub>2</sub>), SO<sub>2</sub>, Ox (NO<sub>2</sub> + O<sub>3</sub>), relative humidity (RH), wind speed (WS), and mixed layer height (MLH).

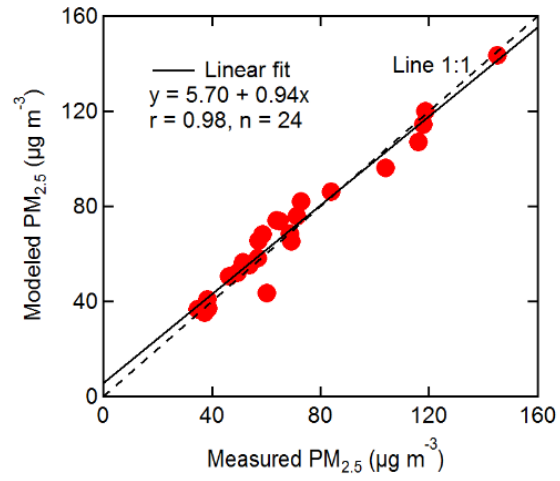

**Figure S3.** Relationship between the mass concentrations of PM<sub>2.5</sub> estimated from the positive factorization model and the measured values.

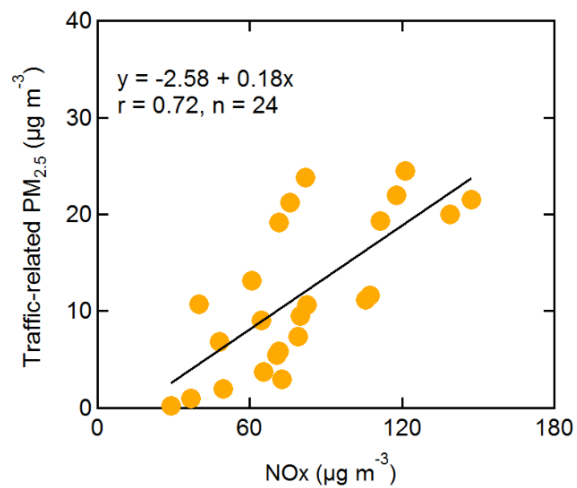

**Figure S4.** Relationship between the traffic-related PM<sub>2.5</sub> mass concentration and the NOx concentration.

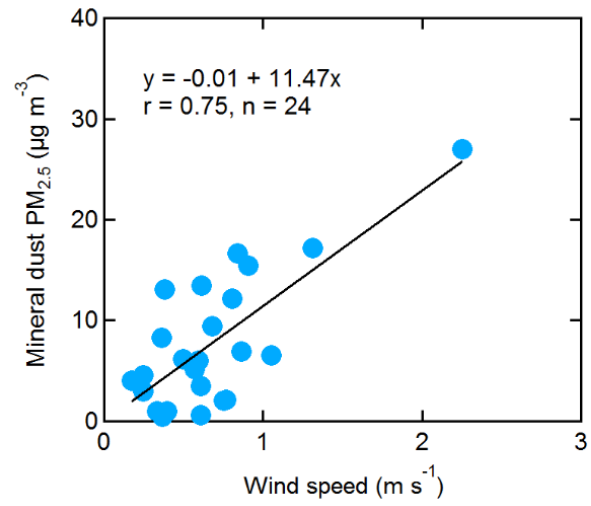

**Figure S5.** Relationship between the PM<sub>2.5</sub> mass concentration from mineral dust and wind speed.

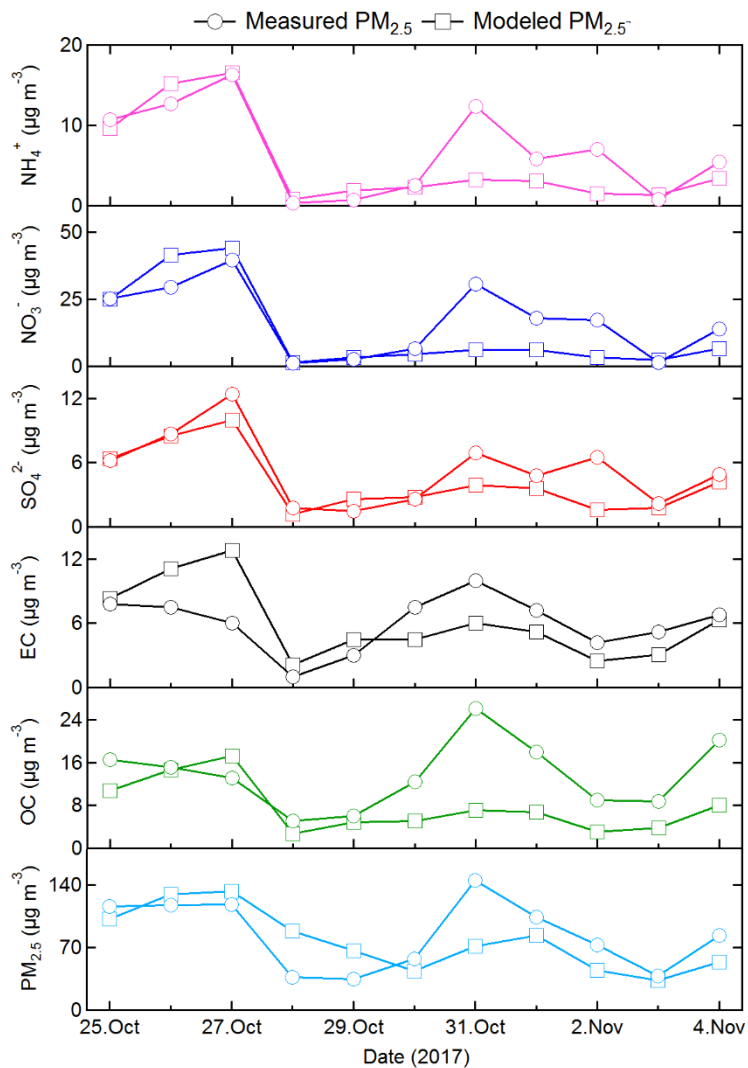

**Figure S6.** Daily variations of the measured mass concentrations of PM<sub>2.5</sub>, organic carbon (OC), elemental carbon (EC), SO<sub>4</sub><sup>2-</sup>, NO<sub>3</sub><sup>-</sup>, and NH<sub>4</sub><sup>+</sup> and their simulated values by the WRF-Chem model.



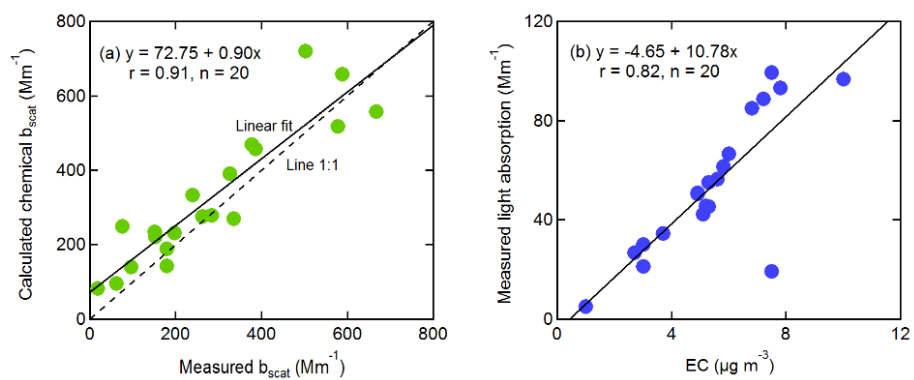

**Figure S7.** Scatter-plots of (a) the calculated chemical light scattering coefficient ( $b_{\text{scat}}$ ) and measured  $b_{\text{scat}}$  and (b) the measured light absorption coefficient and elemental carbon (EC).

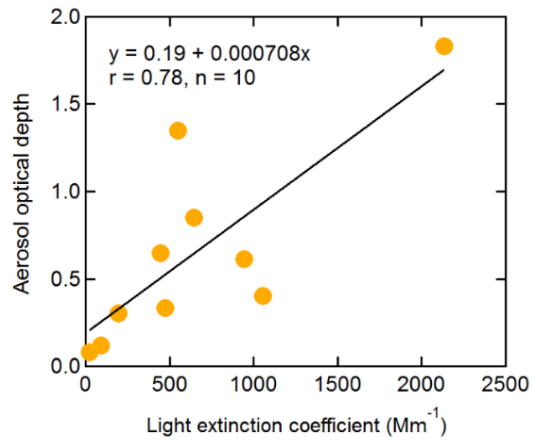

**Figure S8.** Aerosol optical depth versus light extinction coefficient during the campaign.
